# Supplementary material for: Comprehensive benchmarking of RNA velocity methods across single-cell datasets
Source: Research Square preprint supplement (doi:10.21203/rs.3.rs-8708834/v1), 2026-02-02
Supplement: Supplementary file 1 [file 6ee67f24d4a8ccc9309bc7e2.xlsx]

## Sheet: Table of Contents
Table of Contents
Table S1: Summary of the datasets used in this study
Table S2: Summary of cross-validation fold cell numbers
Table S3: Evaluation results of Task I
Table S4: Evaluation results of Task II
Table S5: Evaluation results of Task III
Table S6: Evaluation results of Task IV
Table S7: Evaluation results of Task V
Table S8: Evaluation results of Task VI
Table S9: Evaluation results of Task VII (chromatin accessibility)
Table S10: Evaluation results of Task VII (metabolic labeling)
Table S11: Evaluation results of Task VIII (genes)
Table S12: Evaluation results of Task VIII (cells)
Table S13: Downsampling results for scalability
Table S14: Special model parameter settings

## Sheet: Table S1
Table S1: Summary of the datasets used in this study
Dataset	Technology	Species	Tissue	Cluster key	Time key	FoldNum
Data 1	scRNA-seq	Homo sapiens	bone marrow	clusters	NA	3
Data 2	scATAC-seq, scRNA-seq	Homo sapiens	developing human cerebral cortex (brain)	clusters	NA	5
Data 3	scRNA-seq	Mus musculus	dentate gyrus	clusters	NA	2
Data 4	scRNA-seq	Mus musculus	embryo (gastrulating mouse embryo)	celltype	time	3
Data 5	scRNA-seq	Mus musculus	pancreas	clusters	NA	3
Data 6	scEU-seq	Mus musculus	intestinal organoid	clusters/cell_type	NA	3
Data 7	scNT-seq	Mus musculus	neuronal culture	clusters	time	3
Data 8	scRNA-seq	Mus musculus	Human osteosarcoma (bone cancer) cell line	NA	dtime	3
Data 9	scRNA-seq	Mus musculus	Developing murine hindlimb	NA	stage	3
Data 10	snRNA-seq	Mus musculus	mouse primary visual cortex	NA	day	5
Data 11	scRNA-seq	Mus musculus	Mouse embryonic fibroblasts undergoing direct lineage reprogramming	NA	day	5
Data 12	scRNA-seq	Mus musculus	Mouse embryonic fibroblasts undergoing reprogramming to induced pluripotent stem cells	NA	day	5
Data 13	scRNA-seq	Homo sapiens	Human peripheral blood mononuclear cells (PBMCs)	Clusters	NA	5
Data 14	scRNA-seq	Homo sapiens	Human peripheral blood mononuclear cells (PBMCs)	Clusters	NA	3
Data 15	scRNA-seq	Homo sapiens	Human peripheral blood mononuclear cells (PBMCs)	Clusters	NA	3
Data 16	scRNA-seq	Homo sapiens	Human peripheral blood mononuclear cells (PBMCs)	Clusters	NA	3
Data 17	scRNA-seq	Homo sapiens	Human peripheral blood mononuclear cells (PBMCs)	Clusters	NA	3
Data 18	scATAC-seq, scRNA-seq	Mus musculus	Developing mouse brain	celltype	NA	3
Data 19	CAGE-seq, ChIP-seq, retroviral integration site sequencing	Homo sapiens	Human hematopoietic stem and progenitor cells (HSPCs)	leiden	NA	3
Data 20	scATAC-seq, scRNA-seq	Mus musculus	adult mouse skin	celltype	NA	3
Data 21	scEU-seq	Mus musculus	Human RPE1-FUCCI cells	NA	dtime	3
Data 22	scNT-seq	Homo sapiens	human hematopoiesis	cell_type	NA	3
Data 23	NA	NA	NA	NA	time_t	3
Data 24	NA	NA	NA	NA	time_t	3
Data 25	NA	NA	NA	NA	time_t	3
Data 26	NA	NA	NA	NA	time_t	3
Data 27	NA	NA	NA	NA	sim_time	3
Data 28	NA	NA	NA	NA	sim_time	3
Data 29	NA	NA	NA	NA	time_t
Data 30	NA	NA	NA	NA	time_t

## Sheet: Table S2
Table S2: Summary of cross-validation fold cell numbers
Dataset	Fold_0	Fold_1	Fold_2	Fold_3	Fold_4
Data 1	1927	1927	1926
Data 2	5455	5455	5454	5454	5454
Data 3	1465	1465
Data 4	3272	3272	3271
Data 5	1232	1232	1232
Data 6	1277	1277	1277
Data 7	4492	4492	4492
Data 8	382	382	382
Data 9	3609	3609	3608
Data 10	6113	6112	6112	6112	6112
Data 11	8501	8501	8501	8501	8501
Data 12	8277	8277	8276	8276	8276
Data 13	13176	13176	13175	13175	13175
Data 14	3398	3398	3398
Data 15	2794	2794	2793
Data 16	3499	3499	3499
Data 17	3923	3923	3923
Data 18	1122	1122	1121
Data 19	3869	3868	3868
Data 20	2146	2145	2145
Data 21	931	931	931
Data 22	649	649	649
Data 23	1500	1500	1500
Data 24	1500	1500	1500
Data 25	1600	1600	1600
Data 26	1600	1600	1600
Data 27	1500	1500	1500
Data 28	1500	1500	1500
Data 29
Data 30

## Sheet: Table S3
Table S3: Evaluation results of Task I
Methods	Data1_0_CBDir	Data1_1_CBDir	Data1_2_CBDir	Data1_0_ICVCoh	Data1_1_ICVCoh	Data1_2_ICVCoh	Data2_0_CBDir	Data2_1_CBDir	Data2_2_CBDir	Data2_3_CBDir	Data2_4_CBDir	Data2_0_ICVCoh	Data2_1_ICVCoh	Data2_2_ICVCoh	Data2_3_ICVCoh	Data2_4_ICVCoh	Data3_0_CBDir	Data3_1_CBDir	Data3_0_ICVCoh	Data3_1_ICVCoh	Data4_0_CBDir	Data4_1_CBDir	Data4_2_CBDir	Data4_0_ICVCoh	Data4_1_ICVCoh	Data4_2_ICVCoh	Data5_0_CBDir	Data5_1_CBDir	Data5_2_CBDir	Data5_0_ICVCoh	Data5_1_ICVCoh	Data5_2_ICVCoh	Data6_0_CBDir	Data6_1_CBDir	Data6_2_CBDir	Data6_0_ICVCoh	Data6_1_ICVCoh	Data6_2_ICVCoh	Data7_0_CBDir	Data7_1_CBDir	Data7_2_CBDir	Data7_0_ICVCoh	Data7_1_ICVCoh	Data7_2_ICVCoh
Velocyto	-0.46076	-0.50283	-0.44313	0.791336	0.813607	0.805515	-0.15038	-0.04428	-0.0516	-0.07905	0.113231	0.684474	0.689459	0.688369	0.656486	0.713694	0.566867	0.612649	0.733428	0.575982	0.161654	0.176333	-0.00521488	0.503864	0.570273	0.566973	0.619103	0.470571	0.572297	0.673432	0.696882	0.722779	-0.219839	0.17768	-0.144517	0.56159	0.589104	0.550244	0.1817	0.112291	0.165657	0.420562	0.365285	0.398629
scVelo (dyn)	-0.55418	-0.59821	-0.50765	0.770727	0.737491	0.743239	-0.07554	0.396067	0.063792	-0.21071	0.228475	0.756025	0.671398	0.711961	0.675009	0.68837	0.105203	-0.21461	0.74735	0.817054	-0.589136	-0.345473	-0.261606	0.744032	0.689808	0.665226	0.586208	0.34011	0.598456	0.815403	0.826496	0.813692	-0.32119	-0.437178	-0.0253925	0.716764	0.672446	0.722617	0.055261	0.145363	0.244137	0.839176	0.649419	0.68345
scVelo (stc)	-0.46962	-0.50446	-0.45825	0.829171	0.821181	0.854989	-0.43758	-0.0644	-0.35925	-0.44018	-0.22675	0.752983	0.766407	0.760413	0.772646	0.791977	0.523226	0.655721	0.72191	0.653661	0.185367	0.202602	0.0993105	0.523452	0.483732	0.523129	0.575763	0.399853	0.578576	0.713919	0.743621	0.756344	-0.268011	-0.0636371	-0.0264698	0.664366	0.698715	0.596536	0.104804	0.0434316	0.0992972	0.412736	0.406774	0.363115
VeloAE	-0.67975	-0.59593	-0.58319	0.836585	0.838804	0.901194	0.172576	0.406041	0.273914	0.442898	0.378298	0.803991	0.794534	0.802698	0.850348	0.807402	0.211289	-0.27978	0.780768	0.777551	0.72821	0.655608	0.583587	0.946415	0.901257	0.907974	0.650861	0.509407	0.663844	0.857354	0.769662	0.862444	0.0429383	0.225597	-0.458735	0.903477	0.807448	0.823723	0.407358	0.230654	0.359241	0.80285	0.810933	0.88452
Dynamo (m1)	-0.13273	-0.20225	-0.05839	0.569079	0.585703	0.595365	-0.1358	0.007991	-0.01572	0.056584	-0.26921	0.54663	0.544879	0.574335	0.534929	0.512332	0.225401	0.159805	0.709141	0.601515	-0.59671	-0.60294	-0.563477	0.823705	0.820898	0.82448	0.360944	0.362702	0.404245	0.687803	0.697463	0.684373	-0.35792	0.0328843	-0.128657	0.784073	0.808647	0.794147	-0.260417	-0.260394	-0.205041	0.739775	0.795111	0.741208
UniTVelo (ind)	-0.23655	-0.29814	-0.25514	0.611738	0.622171	0.564864	-0.11153	-0.07408	0.073436	-0.21262	0.050965	0.733505	0.696832	0.712884	0.715174	0.684923	0.504907	0.244297	0.733806	0.596282	0.652484	0.65546	0.618831	0.913402	0.920554	0.893744	0.634287	0.564493	0.653629	0.855436	0.856287	0.875551	-0.416606	0.0717152	-0.0804516	0.842779	0.821082	0.866588	0.388295	0.299586	0.321052	0.817059	0.817714	0.84803
UniTVelo (uni)	0.413232	0.439366	0.461369	0.787213	0.916683	0.921897	-0.39417	0.318997	0.451856	0.378955	0.40087	0.906036	0.921418	0.858485	0.901361	0.906319	-0.13156	0.10386	0.870304	0.805717	-0.0117245	-0.00221938	-0.0647971	0.89834	0.867248	0.850725	0.450226	-0.365438	0.567917	0.808156	0.841231	0.928765	-0.322	0.0321993	-0.174615	0.933522	0.926622	0.819396	0.13934	0.137249	0.199611	0.710625	0.689659	0.574395
VeloVAE (std)	0.110894	-0.0921	-0.05529	0.626488	0.756781	0.611634	-0.12564	-0.04687	-0.27265	-0.54702	-0.23071	0.662191	0.676061	0.615165	0.684846	0.625502	-0.04815	0.087462	0.806265	0.765638	-0.692853	-0.685805	-0.669252	0.914741	0.935545	0.934584	0.175139	0.336266	0.200654	0.662361	0.82284	0.75427	0.124806	0.143988	0.190671	0.734703	0.77939	0.806247	-0.341776	0.113867	-0.212892	0.7731	0.72144	0.798045
VeloVAE (Full VB)	-0.28069	-0.32641	-0.09979	0.817561	0.900213	0.882282	-0.11249	-0.24869	-0.31423	-0.38492	-0.26802	0.767302	0.719989	0.746475	0.788205	0.714796	-0.09758	0.34635	0.827499	0.80922	-0.715677	-0.690224	-0.652448	0.942705	0.929912	0.925525	0.613387	0.426973	0.572365	0.875926	0.871955	0.862636	0.252336	0.111657	0.239054	0.866184	0.792222	0.829911	-0.333441	-0.168269	-0.286575	0.823644	0.783784	0.793518
DeepVelo	-0.08939	-0.05245	-0.05193	0.814911	0.768909	0.800049	0.386469	0.059135	0.272324	-0.01484	0.379561	0.728606	0.654374	0.721926	0.716297	0.664144	0.132213	-0.31814	0.752736	0.769919	0.321953	-0.0477656	0.141721	0.652849	0.708932	0.714498	0.0961237	0.0491631	0.521373	0.770456	0.749023	0.84078	-0.378699	0.0147125	-0.39485	0.83048	0.883248	0.837591	-0.19946	-0.149133	-0.0450465	0.875225	0.855408	0.870087
cellDancer	-0.4893	-0.53637	-0.49199	0.78261	0.838296	0.88797	0.035485	-0.12828	0.014972	-0.07014	-0.02643	0.641741	0.680321	0.601548	0.621185	0.636671	0.304734	0.558579	0.749826	0.693657	0.533476	0.493533	0.528379	0.532261	0.508529	0.608737	0.57107	0.45463	0.436852	0.847051	0.837916	0.799782	0.110661	0.0250947	0.218223	0.452467	0.534342	0.530714	0.00106682	0.0314686	0.0123486	0.384289	0.48703	0.468103
Pyro-Velocity (m1)	-0.54103	-0.39496	-0.53784	0.862736	0.820164	0.907752	-0.00039	-0.12167	0.094288	-0.10323	-0.02721	0.700792	0.747716	0.743465	0.706169	0.749519	0.159409	0.298373	0.763958	0.732807	-0.68679	-0.615429	-0.59793	0.903173	0.871288	0.8758	0.637549	0.451654	0.609256	0.836484	0.859876	0.860584	-0.36988	-0.582779	-0.393985	0.770679	0.815256	0.817498	0.272931	0.106013	0.102982	0.731103	0.397799	0.770913
Pyro-Velocity (m2)	0.456771	-0.20916	-0.20026	0.831897	0.901374	0.870507	-0.19796	0.072696	0.293423	-0.04697	0.020399	0.82035	0.851329	0.844235	0.819092	0.800968	-0.03448	-0.3058	0.760595	0.665302	0.687854	0.642333	0.651625	0.902502	0.885099	0.906864	0.586506	0.468768	0.614975	0.820326	0.856976	0.830695	-0.39157	-0.0975863	-0.342771	0.813845	0.850194	0.812318	0.10504	0.211145	0.113721	0.790959	0.776153	0.77316
k-velo	-0.33967	-0.34943	-0.35252	0.496705	0.354301	0.49906	0.0585	0.335827	-0.05834	-0.37906	0.046791	0.664587	0.672344	0.702018	0.710381	0.677028	0.177863	-0.16791	0.636335	0.613591	-0.281298	-0.504859	-0.194675	0.410013	0.608509	0.367441	0.33193	0.430123	0.473882	0.557635	0.444196	0.52148	-0.184334	-0.0663226	-0.171115	0.760527	0.81379	0.742456	0.08666	0.0621642	0.179622	0.64681	0.347155	0.531423
veloVI	-0.49927	-0.44677	-0.41022	0.784961	0.746267	0.779412	-0.02861	0.210422	0.340552	-0.03833	0.21118	0.765145	0.782969	0.783624	0.786071	0.762166	0.112612	0.377331	0.821548	0.77096	0.7075	0.691222	0.662919	0.931605	0.931204	0.925629	0.598689	0.485921	0.610005	0.744264	0.799569	0.827847	0.236977	0.137066	0.300995	0.827158	0.843275	0.811505	-0.159901	-0.277603	-0.073439	0.746447	0.833794	0.689423
SDEvelo	-0.61792	-0.54726	-0.53701	0.873619	0.899933	0.855488	-0.19516	-0.24427	-0.13122	0.009205	-0.00556	0.626788	0.582021	0.61762	0.610432	0.622975	-0.05757	-0.15501	0.586675	0.762758	0.504606	0.415929	0.410639	0.804471	0.756272	0.770521	-0.0708522	-0.395451	-0.119786	0.735407	0.805958	0.755134	-0.466202	-0.208853	-0.346273	0.835959	0.765698	0.822853	0.279464	0.156858	0.166231	0.797354	0.773927	0.805551
cell2fate	0.21937	0.291604	-0.33659	0.65828	0.77986	0.833906	0.255481	-0.19034	-0.10735	0.368975	0.03511	0.431947	0.431576	0.631298	0.604325	0.501267	0.245698	0.160389	0.465886	0.563855	-0.605577	0.700813	-0.687746	0.698095	0.883959	0.911878	-0.615793	-0.406539	-0.577351	0.833926	0.793114	0.740536	-0.379389	-0.182995	-0.113827	0.851282	0.762261	0.764664	-0.341013	-0.411693	-0.144238	0.760524	0.848211	0.608544
SvelvetVAE	0.271103	0.349968	0.356227	0.581697	0.765262	0.709319	-0.23349	-0.26137	-0.19657	-0.26576	-0.24004	0.711124	0.64583	0.588309	0.679219	0.70848	0.39765	0.09961	0.756832	0.691944	0.439752	0.457899	0.396011	0.791184	0.800309	0.79989	0.653452	0.504876	-0.223141	0.722664	0.83781	0.691871	0.132876	0.029877	0.161684	0.593116	0.703614	0.611764	0.00307283	-0.0330625	0.084581	0.695507	0.591885	0.798283
LatentVelo (std)	0.541104	0.460622	0.489451	0.892315	0.879345	0.89113	-0.42243	0.272355	0.022717	-0.43487	-0.31009	0.833516	0.895043	0.819907	0.832789	0.86497	0.232803	0.276256	0.84983	0.794261	0.632732	0.675936	0.648463	0.908224	0.920355	0.915001	-0.219423	0.203655	-0.065858	0.851962	0.925371	0.921487	0.311291	-0.202899	0.242495	0.930339	0.904052	0.835796	-0.284841	-0.167736	-0.385353	0.849326	0.903566	0.895908
TIVelo (std)	0.183932	0.168029	0.229919	0.705778	0.788027	0.747804	-0.39214	-0.48343	-0.42162	-0.29304	-0.07115	0.729877	0.749736	0.769428	0.765196	0.749841	0.178612	0.312201	0.586481	0.673909	0.483359	-0.532185	-0.543806	0.742042	0.733153	0.762819	0.561154	0.457997	0.582549	0.745741	0.725434	0.691572	-0.173457	0.341432	-0.22726	0.730308	0.718725	0.731802	0.144097	-0.153924	0.118712	0.795062	0.703658	0.795961
TIVelo (simple)	0.182015	0.13693	0.212545	0.600571	0.679799	0.663526	-0.38611	-0.48899	-0.42124	-0.33756	-0.08023	0.644059	0.681709	0.679913	0.671395	0.651174	0.09719	0.293789	0.515538	0.597455	0.472254	-0.49459	-0.508391	0.66008	0.641229	0.668186	0.51795	0.431725	0.534177	0.67063	0.668831	0.648537	-0.15392	0.243308	-0.226983	0.689809	0.68042	0.649017	0.120818	-0.132533	0.102212	0.622562	0.541452	0.654076
scTour (MSE)	-0.15957	-0.49733	-0.35033	0.70563	0.84742	0.772856	0.178474	-0.37298	0.073843	-0.17246	-0.01941	0.592961	0.596371	0.627619	0.626069	0.602486	0.335289	-0.08981	0.549075	0.806635	0.235295	0.0101715	0.205001	0.56455	0.255938	0.66465	0.315416	-0.512991	-0.0244882	0.504371	0.661728	0.595072	-0.41502	0.116829	-0.177624	0.830112	0.725369	0.724525	-0.0605143	-0.181061	-0.273792	0.609704	0.691754	0.707968
scTour (NB)	-0.24959	-0.26802	-0.2637	0.800849	0.827987	0.894225	-0.12512	-0.19778	-0.30573	-0.30894	-0.23611	0.841368	0.844384	0.831891	0.829128	0.844916	-0.08929	0.073307	0.762559	0.726269	0.717055	0.672754	0.649483	0.931169	0.862898	0.866026	-0.602623	0.419927	-0.605862	0.873239	0.910552	0.885879	0.203749	-0.0355085	0.173715	0.865715	0.87803	0.852541	-0.345302	-0.295944	-0.247107	0.839952	0.882661	0.782639
scTour (ZINB)	-0.28632	-0.27471	-0.26391	0.895503	0.839057	0.827801	-0.2866	-0.27082	-0.28922	-0.35049	-0.24082	0.872232	0.890282	0.846611	0.831356	0.870977	-0.06793	0.089294	0.789481	0.764387	0.720969	0.69806	0.673239	0.907392	0.893773	0.929439	-0.595029	0.419189	-0.608651	0.912265	0.898598	0.894987	-0.277248	-0.0486507	0.131777	0.946645	0.821036	0.833882	-0.296027	-0.297078	0.241366	0.897134	0.897086	0.837048
GraphVelo (std)	0.012158	-0.53535	0.239591	0.613016	0.667009	0.715158	-0.14344	-0.2984	-0.23686	-0.03877	0.144771	0.507101	0.432533	0.4823	0.564324	0.517685	-0.05404	0.389887	0.655482	0.588663	-0.46717	-0.563013	-0.606323	0.775822	0.789202	0.792044	0.54022	0.417611	0.575375	0.672097	0.746425	0.711286	-0.226249	0.0253739	-0.134104	0.804853	0.789215	0.656709	0.151372	0.115194	0.156552	0.58885	0.54525	0.497032

## Sheet: Table S4
Table S4: Evaluation results of Task II
Methods	Data4_0_CTO	Data4_1_CTO	Data4_2_CTO	Data4_0_TSC	Data4_1_TSC	Data4_2_TSC	Data8_0_CTO	Data8_1_CTO	Data8_2_CTO	Data8_0_TSC	Data8_1_TSC	Data8_2_TSC	Data9_0_CTO	Data9_1_CTO	Data9_2_CTO	Data9_0_TSC	Data9_1_TSC	Data9_2_TSC	Data10_0_CTO	Data10_1_CTO	Data10_2_CTO	Data10_3_CTO	Data10_4_CTO	Data10_0_TSC	Data10_1_TSC	Data10_2_TSC	Data10_3_TSC	Data10_4_TSC	Data11_0_CTO	Data11_1_CTO	Data11_2_CTO	Data11_3_CTO	Data11_4_CTO	Data11_0_TSC	Data11_1_TSC	Data11_2_TSC	Data11_3_TSC	Data11_4_TSC	Data12_0_CTO	Data12_1_CTO	Data12_2_CTO	Data12_3_CTO	Data12_4_CTO	Data12_0_TSC	Data12_1_TSC	Data12_2_TSC	Data12_3_TSC	Data12_4_TSC
Velocyto	0.507771	0.692342	0.363822	-0.456555	0.811434	-0.738767	0.626803	0.599372	0.723038	0.6965	0.565764	0.80051	0.388988	0.340402	0.3619	-0.29825	-0.528551	-0.492494	0.466447	0.403972	0.54819	0.556745	0.523322	-0.11187	-0.325796	0.162118	0.178988	0.0934432	0.679491	0.605279	0.679897	0.400637	0.693989	0.868502	0.883085	0.879632	-0.785872	0.86674	0.500442	0.402562	0.48112	0.403025	0.431206	-0.566961	-0.621446	-0.799427	-0.551202	-0.461938
scVelo (dyn)	0.290465	0.316767	0.274675	-0.808679	-0.831399	-0.826681	0.399972	0.457356	0.566202	-0.372596	0.0530416	0.256303	0.452876	0.452646	0.450148	-0.282179	-0.15967	-0.282785	0.396611	0.383655	0.372678	0.446591	0.427855	-0.361948	-0.430495	-0.469459	-0.190173	-0.287745	0.440344	0.558848	0.562978	0.572637	0.550595	-0.449148	0.182484	0.212885	0.423019	-0.0812866	0.462345	0.46694	0.454219	0.484453	0.504051	0.404046	0.345302	0.198502	-0.35808	-0.355078
scVelo (stc)	0.7219	0.705396	0.534424	0.810867	0.811226	-0.438578	0.541338	0.554879	0.746002	0.395568	0.533654	0.819136	0.272081	0.410704	0.330959	-0.53244	-0.44865	-0.346015	0.476377	0.426461	0.460161	0.534572	0.534157	-0.0741853	-0.284057	-0.134144	0.0847684	0.115857	0.434764	0.612036	0.61021	0.620473	0.41806	-0.121163	0.890536	0.888557	0.892581	-0.300229	0.497233	0.396145	0.522543	0.404787	0.439413	-0.387606	-0.725195	-0.291614	-0.523023	-0.522263
VeloAE	0.319842	0.27829	0.35197	-0.827463	-0.800859	-0.737038	0.516696	0.441664	0.702485	0.0971566	-0.165981	0.706719	0.587727	0.358863	0.51928	0.446037	-0.410845	0.0796297	0.600894	0.56274	0.441801	0.415345	0.43804	0.385587	0.212278	-0.200492	-0.27709	-0.229396	0.326634	0.582635	0.391521	0.465949	0.377653	-0.805403	0.864573	-0.822549	0.367525	-0.908514	0.493316	0.469803	0.410977	0.43051	0.387566	-0.050732	0.162853	-0.635639	-0.188874	-0.793527
Dynamo (m1)	0.525579	0.571442	0.465031	-0.43112	0.113712	-0.465921	0.496333	0.527181	0.414602	-0.0479275	0.112619	-0.454883	0.567314	0.570029	0.536864	0.187485	0.246961	0.0810396	0.457468	0.441143	0.445222	0.456949	0.456496	-0.528782	-0.494839	-0.512119	-0.441683	-0.519819	0.631286	0.638689	0.621461	0.584011	0.662815	0.786306	0.804058	0.772227	0.792092	0.826908	0.4783	0.498062	0.484832	0.48466	0.501384	0.448804	0.307637	0.415182	0.495718	0.325184
UniTVelo (ind)	0.467709	0.688131	0.341655	-0.544848	0.689587	-0.819315	0.531707	0.470013	0.720838	0.354215	0.0762282	0.7723	0.553128	0.447294	0.508121	0.162052	-0.226909	0.0275672	0.370478	0.381206	0.414935	0.381797	0.415063	-0.478001	-0.423524	-0.333535	-0.4383	-0.342485	0.596411	0.57922	0.478769	0.583688	0.516701	0.600202	0.436403	-0.496553	0.566711	-0.197258	0.456373	0.470675	0.471544	0.474383	0.473091	0.410468	-0.14605	-0.0894908	-0.110188	-0.188705
UniTVelo (uni)	0.670536	0.679424	0.674412	0.808221	0.836358	0.817762	0.608377	0.428157	0.381469	0.608123	-0.485134	-0.557597	0.750824	0.705878	0.744933	0.704727	0.635894	0.677728	0.692234	0.689159	0.672	0.66275	0.684543	0.709385	0.665707	0.628351	0.599426	0.655603	0.47447	0.570526	0.464528	0.505878	0.452095	-0.479293	0.396946	-0.498824	-0.25637	-0.539807	0.490095	0.480927	0.492204	0.476029	0.483235	0.531955	0.445464	0.534864	0.45029	0.527249
VeloVAE (std)	0.326258	0.324108	0.337625	-0.827105	-0.831372	-0.839449	0.431677	0.47642	0.490022	-0.442785	-0.143916	-0.0145755	0.412441	0.403328	0.343819	-0.464777	-0.444206	-0.580961	0.437273	0.405308	0.324297	0.376528	0.417277	-0.2864	-0.415245	-0.650418	-0.542433	-0.471222	0.328298	0.627754	0.61843	0.627829	0.626776	-0.774198	0.698901	0.71715	0.720321	0.715188	0.537181	0.483723	0.531856	0.488067	0.551602	-0.212222	-0.303544	-0.232666	-0.447082	0.0891051
VeloVAE (Full VB)	0.341906	0.321194	0.336329	-0.82446	-0.832281	-0.836932	0.416944	0.486407	0.493268	-0.488278	-0.1505	0.00896577	0.328959	0.462317	0.344527	-0.596992	-0.110553	-0.575694	0.414914	0.383367	0.329294	0.356679	0.433479	-0.381474	-0.4901	-0.624755	-0.600077	-0.302447	0.332475	0.621699	0.619752	0.362738	0.623397	-0.753423	0.671716	0.694348	-0.611731	0.68952	0.540843	0.520744	0.534432	0.518662	0.488716	-0.31799	-0.272941	-0.295702	-0.541416	0.318904
DeepVelo	0.706691	0.699765	0.484521	0.811282	0.810998	-0.526675	0.247936	0.811166	0.763149	-0.791583	0.856839	0.82269	0.572125	0.331406	0.499466	0.432924	-0.556458	-0.00253704	0.471501	0.455193	0.454276	0.534537	0.450319	-0.100434	-0.139131	-0.149636	0.112383	-0.163882	0.612121	0.750828	0.608561	0.751434	0.594142	0.893699	0.91887	0.888575	0.920375	0.879728	0.596262	0.405645	0.468318	0.451273	0.485556	0.62579	-0.725163	0.229035	-0.229728	0.56782
cellDancer	0.716968	0.607987	0.557664	0.805769	0.722007	0.27093	0.618214	0.595468	0.653731	0.583938	0.506897	0.653476	0.547963	0.446192	0.573121	0.136773	-0.183929	0.303446	0.447894	0.498946	0.523108	0.515561	0.515688	-0.21615	0.108021	0.0729793	0.0814785	0.0895151	0.655349	0.528075	0.483757	0.611965	0.564718	0.766651	0.634666	-0.102058	0.377823	0.273957	0.504524	0.533883	0.549519	0.509271	0.494078	-0.53515	0.739845	0.63546	0.749964	0.296491
Pyro-Velocity (m1)	0.301794	0.312988	0.274555	-0.807134	-0.812628	-0.818004	0.43597	0.426419	0.411607	-0.399374	-0.389617	-0.458336	0.39375	0.394341	0.395296	-0.459531	-0.454093	-0.452808	0.451583	0.450157	0.431002	0.43631	0.439999	-0.233463	-0.204978	-0.293433	-0.233464	-0.268427	0.670811	0.68357	0.679997	0.69006	0.670698	0.812463	0.818847	0.817223	0.828043	0.827638	0.474935	0.477288	0.473659	0.476379	0.472609	0.332639	0.330464	0.343221	0.353825	0.325512
Pyro-Velocity (m2)	0.63951	0.66665	0.669901	0.805809	0.810141	0.815332	0.569162	0.587752	0.597349	0.404246	0.416733	0.456836	0.605015	0.608517	0.601374	0.462701	0.457395	0.455659	0.527294	0.532633	0.527135	0.533617	0.534564	0.147753	0.121478	0.114038	0.116278	0.149362	0.348036	0.364049	0.348657	0.348699	0.349706	-0.833232	-0.793074	-0.83143	-0.83124	-0.813043	0.52361	0.521672	0.521973	0.522392	0.524069	-0.324226	-0.321907	-0.357744	-0.351366	-0.317835
k-velo	0.38872	0.306283	0.418985	-0.727245	-0.832413	-0.694788	0.444132	0.448374	0.406858	-0.544856	-0.546464	-0.637924	0.284921	0.521068	0.531059	-0.625038	0.240503	0.175807	0.405531	0.589802	0.335737	0.608806	0.534467	-0.353031	0.343056	-0.61847	0.406523	0.113637	0.387592	0.655794	0.674591	0.63351	0.620809	-0.682028	0.901266	0.912558	0.904344	0.898635	0.477555	0.408977	0.437211	0.41404	0.446152	-0.797126	-0.836188	-0.480117	-0.564013	-0.92446
veloVI	0.712979	0.292878	0.28112	0.832356	-0.817467	-0.846319	0.435921	0.397829	0.702036	-0.0698902	-0.255513	0.765226	0.359287	0.421989	0.445442	-0.417307	-0.274623	-0.210559	0.539407	0.516838	0.400456	0.435422	0.412505	0.252297	0.251741	-0.322109	-0.184517	-0.258571	0.63999	0.610901	0.567553	0.602109	0.63406	0.760376	0.740896	0.623131	0.682256	0.752384	0.507501	0.486052	0.525299	0.488452	0.493949	0.362195	-0.365675	0.513176	-0.600263	-0.367274
SDEvelo	0.504799	0.612909	0.587563	0.816301	0.824508	0.828914	0.571057	0.593623	0.598142	0.545028	0.571419	0.573112	0.601824	0.613329	0.603057	0.524734	0.543079	0.51874	0.541511	0.571462	0.563796	0.544259	0.467949	0.422556	0.499835	0.454477	0.41465	0.0728575	0.583577	0.573246	0.576286	0.579216	0.567525	0.836949	0.819807	0.834218	0.836423	0.826484	0.514248	0.508567	0.523164	0.518041	0.517628	-0.253852	-0.262614	-0.286415	-0.275322	-0.242078
cell2fate	0.301467	0.691596	0.305194	-0.800796	0.7994	-0.815847	0.485383	0.510137	0.473891	-0.0797279	-0.0131035	-0.0899366	0.413997	0.374682	0.566264	-0.462365	-0.508418	0.412085	0.60604	0.620796	0.569145	0.602568	0.573298	0.391187	0.431586	0.246828	0.354565	0.272425	0.577679	0.569897	0.579525	0.606765	0.595966	0.823059	0.756525	0.715041	0.288586	0.838612	0.467785	0.466443	0.459211	0.486055	0.468367	0.213653	0.18983	0.307554	0.137436	0.213827
SvelvetVAE	0.695709	0.730647	0.713521	0.793296	0.807119	0.806515	0.478091	0.560829	0.549534	0.163748	0.383957	0.250309	0.285867	0.317515	0.394401	-0.657622	-0.612551	-0.477939	0.518095	0.517739	0.537151	0.503113	0.459533	0.138326	0.210856	0.272725	-0.0893946	-0.387461	0.661645	0.663172	0.604535	0.564468	0.573232	0.734558	0.73391	0.464798	0.456389	0.494082	0.506957	0.488822	0.488182	0.480255	0.472526	0.320614	0.303885	0.336984	0.294882	0.182908
LatentVelo (std)	0.58443	0.735784	0.6254	0.435497	0.825411	0.625332	0.588279	0.603821	0.667676	0.452072	0.504202	0.705724	0.440474	0.587006	0.436011	-0.39343	0.47574	-0.412198	0.612668	0.517185	0.577172	0.573898	0.573742	0.473485	0.0288143	0.257828	0.275166	0.264893	0.410726	0.34286	0.434422	0.336648	0.280341	-0.761928	-0.82767	-0.677154	-0.890481	-0.902593	0.506482	0.494693	0.47658	0.473265	0.48656	-0.581132	0.531978	-0.790271	-0.754468	-0.72409
TIVelo (std)	0.55913	0.719058	0.513151	-0.355821	0.813828	-0.525277	0.60321	0.472572	0.776595	0.316455	-0.306643	0.841118	0.431149	0.340134	0.531601	-0.365481	-0.538892	0.184517	0.369124	0.39232	0.390253	0.517895	0.389589	-0.459775	-0.380286	-0.385839	0.0392366	-0.391452	0.719461	0.75151	0.697959	0.259602	0.652448	0.91355	0.922574	0.90397	-0.909034	0.897843	0.58981	0.403442	0.44589	0.465565	0.466134	0.729696	-0.724167	-0.147608	-0.157466	-0.208144
TIVelo (simple)	0.561432	0.719548	0.515739	-0.356973	0.815354	-0.528804	0.603296	0.472572	0.776595	0.316672	-0.306459	0.841118	0.430932	0.332536	0.531193	-0.365658	-0.550377	0.185051	0.366587	0.39329	0.371605	0.520075	0.387523	-0.462276	-0.372841	-0.45561	0.0417423	-0.398869	0.665549	0.753768	0.677971	0.622874	0.61807	0.907031	0.923506	0.903087	0.898095	0.894237	0.407927	0.401983	0.445589	0.468824	0.46576	-0.645026	-0.713931	-0.14616	-0.153122	-0.207404
scTour (MSE)	0.0140682	0.529535	0.428074	0.202282	-0.039474	-0.302901	0.514192	0.426221	0.498825	0.243287	-0.505153	-0.341491	0.0246517	0.376164	0.376227	-0.673387	-0.489801	-0.467154	0.497969	0.50853	0.520866	0.509132	0.507242	0.18942	0.222565	0.258685	0.232867	0.219532	0.633349	0.000937763	0.0102284	0.628316	0.637425	0.686667	-0.0158295	0.0755556	0.665573	0.682684	NA	0.503845	0.532378	0.495887	NA	NA	0.110166	-0.301757	0.226644	NA
scTour (NB)	0.654012	0.661478	0.664888	0.797319	0.802035	0.811735	0.436303	0.476848	0.410455	-0.337366	-0.187422	-0.355452	0.45161	0.463626	0.469774	-0.247464	-0.164058	-0.0744002	0.393725	0.395357	0.397564	0.398996	0.392688	-0.389986	-0.374481	-0.363236	-0.356331	-0.387597	0.557726	0.563002	0.618725	0.705491	0.610889	0.824391	0.855361	0.892676	0.877662	0.878095	0.468698	0.531008	0.541939	0.539349	0.543302	-0.614011	-0.402532	-0.374637	-0.36544	-0.358339
scTour (ZINB)	0.653938	0.666492	0.662632	0.801607	0.805063	0.812351	0.425521	0.458006	0.404141	-0.392555	-0.282952	-0.403484	0.563995	0.431767	0.436634	0.410307	-0.438802	-0.335794	0.445056	0.446964	0.393826	0.399649	0.39239	-0.241863	-0.21398	-0.378934	-0.34703	-0.38576	0.557231	0.759057	0.764174	0.569476	0.753535	0.830252	0.913872	0.91503	0.828885	0.911104	0.524451	0.546835	0.539845	0.552787	0.529375	-0.40475	-0.249987	-0.424872	-0.25007	-0.393199
GraphVelo (std)	0.317375	0.312125	0.288142	-0.800244	-0.818893	-0.815576	0.465427	0.596325	0.65878	-0.214023	0.667876	0.474601	0.538774	0.531984	0.510658	0.12747	0.0736052	0.00359668	0.539839	0.454068	0.438535	0.503232	0.493339	0.242357	-0.404767	-0.406101	-0.121019	-0.0143966	0.394487	0.590788	0.670244	0.73832	0.476249	-0.548354	0.69678	0.785144	0.895425	-0.260094	0.540451	0.539913	0.5418	0.499774	0.526359	0.110536	0.209351	0.280166	0.195742	0.0341255

## Sheet: Table S5
Table S5: Evaluation results of Task III
Methods	Data13_0_STS	Data13_1_STS	Data13_2_STS	Data13_3_STS	Data13_4_STS	Data13_0_NTE	Data13_1_NTE	Data13_2_NTE	Data13_3_NTE	Data13_4_NTE	Data14_0_STS	Data14_1_STS	Data14_2_STS	Data14_0_NTE	Data14_1_NTE	Data14_2_NTE	Data15_0_STS	Data15_1_STS	Data15_2_STS	Data15_0_NTE	Data15_1_NTE	Data15_2_NTE	Data16_0_STS	Data16_1_STS	Data16_2_STS	Data16_0_NTE	Data16_1_NTE	Data16_2_NTE	Data17_0_STS	Data17_1_STS	Data17_2_STS	Data17_0_NTE	Data17_1_NTE	Data17_2_NTE
Velocyto	0.190063	0.219851	0.218454	0.181908	0.202711	0.513668	0.569926	0.536445	0.525876	0.573956	0.180987	0.160991	0.191519	0.759993	0.761112	0.724258	0.338533	0.332444	0.183068	0.658269	0.65018	0.865949	0.265841	0.280284	0.247902	0.714294	0.725789	0.715041	0.227351	0.244079	0.218831	0.754304	0.72387	0.732043
scVelo (dyn)	0.202867	0.261946	0.188748	0.241849	0.211164	0.42543	0.34489	0.507236	0.458765	0.366066	0.277618	0.224489	0.239353	0.517212	0.501057	0.573563	0.286679	0.240481	0.26643	0.606758	0.622066	0.617088	0.426867	0.499363	0.439967	0.557003	0.527328	0.598952	0.275046	0.430075	0.368572	0.564443	0.537746	0.594936
scVelo (stc)	0.201726	0.224067	0.225047	0.19126	0.206762	0.50497	0.562665	0.534039	0.515968	0.564183	0.146513	0.12465	0.156719	0.772158	0.801097	0.782862	0.338745	0.332382	0.196105	0.649613	0.644754	0.871782	0.210433	0.224356	0.215302	0.718366	0.751705	0.728821	0.190691	0.251509	0.179777	0.770253	0.746272	0.758069
VeloAE	0.0836679	0.113675	0.048558	0.0892565	0.02051	0.920604	0.788935	0.923177	0.827874	0.944604	0.016194	0.0157508	0.0133637	0.885571	0.865001	0.87252	0.129732	0.0638057	0.0410125	0.707375	0.720547	0.855043	0.101032	0.112175	0.134025	0.857309	0.865832	0.686192	0.0288667	0.0305289	0.11475	0.919308	0.890265	0.815229
Dynamo (m1)	0.177838	0.194153	0.167999	0.166473	0.186342	0.879252	0.869597	0.879401	0.875992	0.871954	0.256463	0.253152	0.274376	0.501337	0.483528	0.505522	0.337433	0.31448	0.362313	0.691806	0.697181	0.62828	0.204207	0.20285	0.214631	0.872288	0.867606	0.880914	0.287607	0.28277	0.270079	0.468338	0.449276	0.458651
UniTVelo (ind)	0.271589	0.304038	0.278604	0.30124	0.311814	0.611258	0.635936	0.550743	0.627779	0.61904	0.138119	0.12162	0.188025	0.579207	0.606572	0.549163	0.144265	0.144329	0.143426	0.577215	0.584094	0.593606	0.27244	0.240507	0.307083	0.668757	0.615309	0.62696	0.152089	0.147312	0.146057	0.636684	0.661543	0.653338
UniTVelo (uni)	0.207462	0.237308	0.2961	0.28225	0.192512	0.66004	0.613935	0.452851	0.651833	0.568446	0.288246	0.197615	0.284747	0.64279	0.633863	0.588106	0.221224	0.218414	0.255218	0.512416	0.548878	0.581841	0.274407	0.282028	0.288331	0.597689	0.588036	0.603462	0.22795	0.347869	0.242018	0.603034	0.715584	0.613386
VeloVAE (std)	0.269585	0.27663	0.236739	0.323075	0.298316	0.423406	0.395395	0.494772	0.456251	0.44297	0.279807	0.291431	0.297608	0.514893	0.530505	0.51557	0.353718	0.334893	0.357886	0.45475	0.478704	0.411473	0.440861	0.396568	0.44122	0.529953	0.492628	0.521907	0.365233	0.375136	0.4145	0.493079	0.501685	0.525237
VeloVAE (Full VB)	0.235686	0.264344	0.235145	0.219807	0.228524	0.409562	0.396798	0.407972	0.369265	0.374674	0.184562	0.277288	0.252734	0.511872	0.517473	0.517352	0.346365	0.275551	0.370991	0.480659	0.430045	0.458611	0.34644	0.409812	0.346663	0.551297	0.575878	0.546892	0.242555	0.314615	0.410783	0.490213	0.490319	0.519772
DeepVelo	0.204033	0.132544	0.161329	0.18249	0.167004	0.454467	0.449002	0.451306	0.438489	0.46938	0.324939	0.286826	0.26889	0.669346	0.634546	0.628355	0.271953	0.277717	0.242937	0.569682	0.542634	0.549153	0.265407	0.241857	0.278472	0.633289	0.626023	0.626601	0.368959	0.288009	0.30193	0.678604	0.621277	0.662892
cellDancer	0.219677	0.236979	0.220643	0.220874	0.229163	0.59433	0.613777	0.551592	0.546616	0.55742	0.299329	0.294387	0.298469	0.480102	0.488742	0.48623	0.293024	0.277724	0.289799	0.457103	0.470311	0.473191	0.585107	0.547731	0.56585	0.689098	0.680395	0.664383	0.31721	0.331409	0.305415	0.487187	0.500049	0.486493
Pyro-Velocity (m1)	0.261914	0.248101	0.239135	0.249382	0.250241	0.484874	0.517963	0.508256	0.496281	0.518856	0.305472	0.270648	0.208652	0.401708	0.467971	0.536699	0.470651	0.479416	0.209154	0.530634	0.523728	0.415374	0.358263	0.302484	0.353548	0.59027	0.568341	0.554313	0.269676	0.256895	0.265613	0.465541	0.489036	0.456719
Pyro-Velocity (m2)	0.342948	0.336037	0.334625	0.391969	0.327405	0.486373	0.489174	0.54259	0.559367	0.51457	0.323194	0.31147	0.38537	0.43036	0.436029	0.530024	0.272724	0.238872	0.287761	0.43604	0.46945	0.450745	0.477915	0.46565	0.47154	0.569481	0.568256	0.592752	0.352035	0.36948	0.343084	0.474274	0.508255	0.475209
k-velo	0.320121	0.215973	0.345347	0.322567	0.379312	0.574122	0.533734	0.59902	0.389678	0.57582	0.165904	0.295399	0.335633	0.815968	0.613793	0.468272	0.279407	0.243393	0.300131	0.47636	0.492625	0.472856	0.399594	0.409705	0.458417	0.541016	0.713192	0.702378	0.355243	0.440986	0.455254	0.586591	0.758997	0.65649
veloVI	0.193728	0.180883	0.203474	0.17822	0.202031	0.418873	0.374094	0.392328	0.403832	0.466298	0.247129	0.291127	0.261418	0.620235	0.541775	0.650345	0.270226	0.207983	0.206992	0.587695	0.611155	0.643842	0.279252	0.304089	0.263733	0.550564	0.568952	0.648682	0.208813	0.209642	0.225856	0.580334	0.569304	0.579157
SDEvelo	0.429139	0.437776	0.443292	0.447594	0.445311	0.871871	0.851539	0.885015	0.870415	0.866185	0.19919	0.218094	0.218076	0.406376	0.426747	0.424653	0.431984	0.411347	0.446145	0.703652	0.667773	0.692427	0.516577	0.515817	0.507027	0.715208	0.725415	0.747508	0.447742	0.462924	0.249285	0.673188	0.691808	0.422117
cell2fate	0.311972	0.332165	0.304819	0.279863	0.419498	0.670446	0.583455	0.682259	0.642477	0.768813	0.312516	0.270844	0.215656	0.586341	0.678191	0.626754	0.253997	0.17775	0.265875	0.609683	0.642659	0.547669	0.280339	0.347909	0.427711	0.682604	0.652395	0.779998	0.291697	0.203462	0.242382	0.570116	0.596511	0.607364
SvelvetVAE	0.179806	0.156198	0.161472	0.162129	0.163904	0.488396	0.438114	0.482652	0.446549	0.449516	0.24925	0.219762	0.281975	0.387653	0.450899	0.456061	0.256534	0.186034	0.185656	0.482184	0.43861	0.453753	0.237383	0.320806	0.225722	0.482687	0.524652	0.45073	0.277921	0.28774	0.252543	0.44436	0.433056	0.408207
LatentVelo (std)	0.048726	0.126423	0.272265	0.219068	0.0766008	0.453744	0.309407	0.472653	0.488622	0.43599	0.20557	0.374148	0.194422	0.452642	0.323558	0.464797	0.203176	0.188205	0.151469	0.448052	0.446958	0.46474	0.166147	0.207226	0.198614	0.473236	0.503745	0.460748	0.189671	0.281324	0.193499	0.476044	0.429267	0.503482
TIVelo (std)	0.235842	0.173144	0.286168	0.30459	0.337232	0.646859	0.572508	0.688362	0.657983	0.677924	0.15225	0.125057	0.092524	0.635403	0.643929	0.64558	0.16837	0.17149	0.150334	0.70018	0.694486	0.71004	0.146171	0.159299	0.200325	0.640021	0.615096	0.640366	0.138724	0.138532	0.16598	0.660091	0.64402	0.641826
TIVelo (simple)	0.0377816	0.0463931	0.0353393	0.044674	0.0337686	0.680156	0.676954	0.675854	0.659205	0.696683	0.0983874	0.0825339	0.0699467	0.595501	0.617566	0.630773	0.0702584	0.0763453	0.0628833	0.658318	0.650117	0.684679	0.0952361	0.099558	0.106263	0.603168	0.574107	0.578605	0.0794552	0.085251	0.0883512	0.628129	0.606519	0.600994
scTour (MSE)	0.0334914	0.0412411	0.0218211	0.0211186	0.0214836	0.493471	0.491253	0.589103	0.56679	0.591906	0.160949	0.0818748	0.0519756	0.35023	0.499916	0.635921	0.0295502	0.0549895	0.0441044	0.774279	0.557778	0.645792	0.153847	0.0932674	0.131454	0.421989	0.530281	0.446582	0.202177	0.126655	0.185213	0.379901	0.527449	0.338733
scTour (NB)	0.0257223	0.266743	0.299995	0.0650528	0.25771	0.533247	0.187412	0.176601	0.413328	0.19223	0.128125	0.103462	0.124626	0.307696	0.375304	0.326553	0.100609	0.122283	0.0885529	0.342721	0.299665	0.358856	0.117481	0.115999	0.101046	0.398124	0.360617	0.375862	0.11334	0.113623	0.117902	0.316616	0.341009	0.33207
scTour (ZINB)	0.0316595	0.179859	0.0999137	0.209405	0.108417	0.483004	0.241482	0.343536	0.215484	0.312621	0.137374	0.110303	0.115904	0.297925	0.344686	0.347671	0.106872	0.0954159	0.104472	0.341331	0.362103	0.354647	0.115004	0.114333	0.124921	0.372916	0.356009	0.330585	0.138379	0.121593	0.139864	0.316298	0.320341	0.304013
GraphVelo (std)	0.240724	0.237127	0.25174	0.240724	0.215981	0.362559	0.376955	0.371995	0.362559	0.365178	0.105637	0.120892	0.143946	0.481639	0.506409	0.525849	0.184229	0.172147	0.160688	0.503981	0.499577	0.481274	0.204088	0.206888	0.215916	0.54075	0.528879	0.54291	0.0958075	0.149246	0.144619	0.528905	0.547295	0.521622

## Sheet: Table S6
Table S6: Evaluation results of Task IV
Methods	Data3_0.2_CBDir	Data3_0.4_CBDir	Data3_0.6_CBDir	Data3_0.8_CBDir	Data3_1.0_CBDir	Data3_S_CBDir	Data4_0.2_CBDir	Data4_0.4_CBDir	Data4_0.6_CBDir	Data4_0.8_CBDir	Data4_1.0_CBDir	Data4_S_CBDir	Data6_0.2_CBDir	Data6_0.4_CBDir	Data6_0.6_CBDir	Data6_0.8_CBDir	Data6_1.0_CBDir	Data6_S_CBDir	Data4_0.2_TSC	Data4_0.4_TSC	Data4_0.6_TSC	Data4_0.8_TSC	Data4_1.0_TSC	Data4_S_TSC	Data8_0.2_TSC	Data8_0.4_TSC	Data8_0.6_TSC	Data8_0.8_TSC	Data8_1.0_TSC	Data8_S_TSC	Data9_0.2_TSC	Data9_0.4_TSC	Data9_0.6_TSC	Data9_0.8_TSC	Data9_1.0_TSC	Data9_S_TSC
Velocyto	0.19052	0.20273	0.487225	0.427947	0.494822	0.590959	0.20735	0.320096	0.282893	0.146383	0.130937	0.605881	-0.151992	-0.129091	-0.110279	-0.0819822	-0.0672325	0.565657	0.805695	0.803741	0.803312	0.802132	0.796371	0.902491	0.761048	0.754207	0.768279	0.775918	0.745181	0.875722	-0.438128	-0.307798	-0.287533	-0.309751	0.118121	0.382036
scVelo (dyn)	0.159238	0.168906	0.531466	0.462745	0.429458	0.569052	-0.168831	-0.26094	-0.317926	-0.233385	-0.246063	0.51897	-0.100363	-0.0770925	-0.165764	-0.153525	-0.25573	0.523295	0.812558	0.555709	-0.204973	-0.82616	-0.824449	0.130016	0.175438	0.708618	0.116502	0.0380351	0.377533	0.473034	-0.248964	-0.166581	-0.183252	-0.21401	-0.0953738	0.527813
scVelo (stc)	0.225634	0.178518	0.294152	0.24387	0.261156	0.650378	0.222704	0.232873	0.200191	0.129171	0.106391	0.618127	-0.117179	-0.0680288	0.0347043	-0.0140002	0.0240581	0.556108	0.806781	0.80444	0.803024	0.802116	0.796629	0.902405	0.713549	0.755957	0.743657	0.760772	0.720321	0.857079	-0.371159	-0.395161	-0.401371	-0.308151	-0.352978	0.513425
VeloAE	0.144931	0.266244	0.325724	0.177156	0.162264	0.610136	0.625513	0.645886	0.655355	0.651665	0.354836	0.693045	-0.286162	-0.367118	0.217338	0.264548	0.147436	0.370121	-0.0503002	-0.678691	0.480889	-0.769565	-0.821626	0.143776	0.845365	0.721008	0.250229	0.670011	0.7627	0.634824	-0.489744	-0.538959	-0.500731	-0.462485	-0.379827	0.476766
Dynamo (m1)	0.125257	-0.0929862	0.302145	0.481648	0.468093	0.483699	-0.523334	-0.534714	-0.56528	-0.562589	-0.563709	0.505988	-0.0722655	-0.112459	-0.0808853	0.0109874	0.0264335	0.55484	0.664962	0.301758	-0.410948	-0.673407	-0.674472	0.164853	-0.399126	0.0472764	0.0717434	0.123966	0.274617	0.410508	0.0377037	-0.370172	-0.285681	0.00724396	0.0280766	0.421124
UniTVelo (ind)	-0.0341989	0.186181	0.583496	0.565593	0.624557	0.489366	0.628263	0.628821	0.614061	0.637907	0.629619	0.822632	-0.155197	-0.164289	-0.102532	-0.154732	-0.0994533	0.562458	0.707926	0.836912	0.802935	0.744877	0.776146	0.844496	0.460015	0.78803	0.504181	0.418957	0.308616	0.617029	0.283319	0.451037	-0.0395512	0.204535	0.043755	0.501115
UniTVelo (uni)	0.0303528	-0.020342	-0.014438	0.0736635	0.025589	0.592349	-0.015601	-0.0250593	-0.0158753	-0.0188361	-0.0168128	0.616528	-0.122374	-0.239435	-0.18769	-0.192511	-0.133191	0.538418	0.815321	0.798272	0.785981	0.784329	0.797457	0.890984	-0.621742	-0.46433	-0.323352	-0.483244	-0.608937	0.416733	0.573476	0.670159	0.721018	0.710638	0.732463	0.790734
VeloVAE (std)	0.129056	0.112183	-0.00834203	-0.259931	-0.0275644	0.47866	0.586835	0.615113	0.547036	0.642626	0.606554	0.784898	0.109158	0.252057	0.257326	0.197945	0.244498	0.623387	0.838589	0.825627	0.833699	0.813786	0.813598	0.905057	0.101032	-0.0435535	-0.142872	-0.118907	-0.173241	0.503128	0.692666	-0.0222704	0.290072	0.5793	-0.0127739	0.437907
VeloVAE (Full VB)	0.104863	-0.165774	-0.340612	0.221163	-0.0167393	0.418516	0.620126	0.620919	0.642284	0.640227	0.630973	0.82214	0.186934	0.211523	0.263558	-0.239829	0.230598	0.472661	0.830202	0.829785	0.820686	0.8219	0.814758	0.909106	0.150708	0.026688	-0.0962552	-0.25492	-0.114565	0.469333	0.671266	-0.470816	-0.00944584	0.191553	-0.0541747	0.312804
DeepVelo	-0.181319	-0.0210893	0.427147	0.291684	0.269663	0.448649	0.392402	0.102919	-0.242404	0.0479827	0.12088	0.446362	-0.176477	-0.226782	-0.260969	-0.192384	-0.233303	0.543329	0.828945	0.816003	0.812779	0.811731	0.749244	0.875943	0.847136	0.805629	0.82225	0.798797	0.784049	0.886356	0.271021	-0.355418	0.132238	0.450888	-0.374182	0.327669
cellDancer	0.309706	0.209485	0.340223	0.321971	0.404279	0.648983	0.428764	0.481853	0.511458	0.531274	0.527136	0.738337	0.0501344	0.116388	0.0576927	0.136473	0.0812113	0.611506	0.649945	0.537106	0.821583	0.568706	0.388774	0.671074	0.736148	0.761427	0.7697	0.658928	0.770636	0.832205	0.0272267	0.320989	0.00150339	0.158724	0.126014	0.539949
Pyro-Velocity (m1)	0.284704	0.224835	0.0212551	0.285991	0.120376	0.568068	-0.587531	-0.614987	-0.613702	-0.62857	-0.631089	0.501347	0.247599	-0.353124	-0.268809	-0.270214	-0.292269	0.367148	-0.811085	-0.80874	-0.803192	-0.803992	-0.803963	0.501193	-0.44469	-0.414777	-0.426095	-0.41277	-0.415981	0.528481	-0.435647	-0.390044	-0.381048	-0.373804	-0.35502	0.517371
Pyro-Velocity (m2)	-0.208494	-0.293059	0.0524639	0.201955	0.0444399	0.431788	0.603581	0.612696	0.649576	0.638813	0.635607	0.812329	-0.275834	-0.214721	-0.269506	-0.220056	-0.255484	0.543065	0.804813	0.802715	0.801664	0.801939	0.799112	0.903871	0.397724	0.395291	0.400612	0.38945	0.401744	0.739052	0.311112	0.351786	0.3361	0.316678	0.280733	0.691004
k-velo	0.0215111	-0.169029	-0.209734	0.195774	0.217434	0.448817	-0.338502	-0.178916	-0.316407	-0.295028	-0.252001	0.504427	-0.203502	-0.186408	-0.209148	-0.166139	-0.16294	0.562099	-0.828759	-0.827102	-0.732732	-0.740212	-0.714167	0.453213	0.712865	0.680035	0.735462	0.712236	0.692872	0.843123	-0.589298	-0.512985	0.117365	-0.387905	-0.459921	0.309098
veloVI	0.187557	0.585991	0.631153	0.562105	0.422589	0.609205	0.647051	0.622762	0.643559	0.656443	0.66962	0.822298	0.00251025	-0.0776832	0.196051	0.121695	0.139614	0.539719	0.484395	0.702863	0.844899	0.840792	0.597215	0.714647	0.414565	0.641828	0.647151	0.654246	0.658904	0.721196	-0.361253	-0.104304	0.0564936	0.515784	0.601393	0.337035
SDEvelo	0.071012	0.045162	0.0799725	0.137595	0.105511	0.613353	0.274271	0.31986	0.363562	0.383341	0.433995	0.670395	-0.055085	-0.260744	-0.232501	-0.260919	-0.315489	0.480445	0.821016	0.823791	0.825279	0.826136	0.821163	0.9133	0.165322	0.659152	0.66614	0.660431	0.674193	0.607623	0.547942	0.56214	0.559579	0.560834	0.560332	0.797711
cell2fate	0.512837	0.379029	-0.0232998	0.567243	0.272461	0.518159	0.614132	0.571988	0.118556	0.701304	0.705161	0.583363	0.181413	-0.181522	-0.203674	-0.140715	-0.0886275	0.460358	0.809127	0.798554	-0.802755	0.798943	0.799218	0.313948	0.211639	0.0603942	0.128977	0.0733542	0.0604106	0.590268	-0.304502	-0.413704	-0.295382	-0.287534	0.328037	0.328424
SvelvetVAE	-0.345566	-0.196542	-0.183123	-0.176879	-0.156801	0.504414	0.434164	-0.416401	-0.0146	0.157077	-0.0392575	0.368898	0.333277	-0.0669453	0.234697	0.0875317	0.252254	0.524604	0.395638	-0.808148	-0.773583	-0.771993	0.75094	0.102087	0.446273	0.442603	0.356338	0.475379	0.472245	0.711563	0.506647	0.553669	0.515692	0.520185	0.469948	0.756657
LatentVelo (std)	-0.39527	-0.201918	0.43843	0.203521	0.0892794	0.356387	0.553578	0.565994	0.559559	0.492024	0.570418	0.768067	-0.122442	0.229523	0.212041	0.250414	0.241488	0.521833	0.819657	0.811014	0.810583	0.709417	0.734787	0.844942	-0.580909	-0.552189	-0.6045	-0.754527	0.503201	0.165533	-0.589782	0.482335	-0.574241	0.45648	-0.30242	0.207096
TIVelo (std)	0.0459152	0.534814	0.616383	0.364367	0.131533	0.50717	0.606863	0.577017	0.517876	0.492767	0.486706	0.743199	0.244892	-0.142675	-0.184603	-0.191737	-0.204555	0.428786	0.80614	0.804092	0.80381	0.804792	0.701706	0.852869	0.777779	0.784322	0.793241	0.796637	0.712978	0.859169	-0.0442711	-0.428061	-0.084662	-0.411115	-0.406806	0.391437
TIVelo (simple)	-0.0272806	0.47509	0.561723	0.30377	0.104719	0.489827	0.535024	0.506679	0.483023	0.466623	0.471976	0.750666	0.304568	-0.16871	-0.194502	-0.187878	-0.194931	0.408201	0.809089	0.805671	0.805752	0.806073	0.659243	0.831028	0.778493	0.784671	0.793678	0.797337	0.716334	0.860846	-0.0387417	-0.400794	0.0308147	-0.4275	-0.411263	0.370188
scTour (MSE)	0.275389	-0.338626	-0.334389	0.0690138	0.191717	0.369173	0.617667	-0.556559	0.279177	0.347096	-0.218515	0.288609	-0.236608	-0.278693	-0.179294	-0.312824	-0.380418	0.492045	0.815962	NA	NA	-0.702931	0.183592	0.179029	-0.248262	-0.780752	-0.389575	0.0691492	-0.100043	0.29213	-0.487479	-0.496684	-0.493162	0.0502634	-0.14757	0.337702
scTour (NB)	0.0823427	0.344594	-0.0703727	-0.245023	-0.0621161	0.431558	0.64956	0.67261	0.627728	0.615984	0.625198	0.812896	-0.210082	0.239786	0.268785	0.216009	0.19251	0.484043	0.811579	0.805998	0.798001	0.794961	0.794631	0.898028	-0.291152	-0.28553	-0.268905	-0.163949	-0.22619	0.519235	-0.456466	-0.272791	-0.0735244	-0.0731145	-0.084654	0.425693
scTour (ZINB)	0.104976	-0.276688	-0.116981	0.0166732	-0.0348776	0.475773	0.655262	0.656237	0.616219	0.626014	0.637103	0.817932	-0.230139	0.203254	0.26039	0.198995	0.176523	0.477979	0.812018	0.807417	0.798571	0.795725	0.796593	0.898709	-0.324182	-0.337642	-0.357125	-0.265742	-0.227892	0.508395	-0.461796	-0.192075	-0.108148	0.00194169	-0.0778472	0.424025
GraphVelo (std)	0.116523	0.217707	0.293921	0.0138004	-0.0608484	0.521536	0.543596	0.385889	-0.46301	-0.465169	-0.431005	0.226473	-0.0596513	-0.0222672	-0.0722786	-0.127372	-0.120313	0.562868	0.837904	0.824568	-0.722057	-0.831887	-0.792883	0.0997772	-0.507788	0.697982	0.694415	0.125409	-0.0568587	0.29439	0.0846913	0.289287	-0.297502	0.0446038	0.156465	0.444874

## Sheet: Table S7
Table S7: Evaluation results of Task V
Methods	alevin_CBDir	dropest_CBDir	kallisto_bustools_CBDir	starsolo_CBDir	velocyto_CBDir	S_CBDir	alevin_ICVCoh	dropest_ICVCoh	kallisto_bustools_ICVCoh	starsolo_ICVCoh	velocyto_ICVCoh	S_ICVCoh
Velocyto	0.544334	0.383595	0.495968	0.460083	0.355236	0.686861	0.710032	0.625832	0.732082	0.708718	0.691072	0.818782
scVelo (dyn)	0.479862	0.370223	0.518709	0.347273	0.424758	0.685473	0.806166	0.702778	0.819295	0.813404	0.770195	0.849862
scVelo (stc)	0.548889	0.318403	0.482802	0.411114	0.346023	0.661697	0.729515	0.632806	0.712011	0.679396	0.686481	0.820044
VeloAE	0.333267	0.439557	0.552979	0.519686	0.344586	0.663948	0.784287	0.832536	0.907516	0.842541	0.738168	0.852728
Dynamo (m1)	0.332538	0.106232	0.285472	0.25434	0.317639	0.611625	0.646011	0.566023	0.641557	0.661952	0.704068	0.78901
UniTVelo (ind)	0.429771	0.496492	0.569651	0.568512	0.576711	0.729971	0.917418	0.864199	0.90786	0.867813	0.868239	0.919117
UniTVelo (uni)	-0.162393	0.322604	0.265008	0.26625	0.291856	0.497333	0.876516	0.881108	0.919154	0.91251	0.92482	0.930437
VeloVAE (std)	-0.0152473	0.326522	0.334238	0.176631	0.331656	0.54814	0.592759	0.691117	0.738145	0.702954	0.725558	0.801248
VeloVAE (Full VB)	0.118949	0.517989	0.551944	0.417628	0.522005	0.591256	0.664093	0.809446	0.888804	0.85243	0.835487	0.82675
DeepVelo	0.425727	-0.116122	0.0754978	0.221806	0.105355	0.48352	0.760965	0.685273	0.72907	0.735393	0.70757	0.8431
cellDancer	0.182651	0.0552133	0.0325572	0.171778	0.0629476	0.583478	0.566479	0.326395	0.301071	0.26579	0.236737	0.601366
Pyro-Velocity (m1)	-0.522783	0.504331	0.496718	0.499236	0.549879	0.356939	0.885472	0.828469	0.834128	0.836347	0.833365	0.901508
Pyro-Velocity (m2)	0.57089	0.502939	0.463736	0.493536	0.533247	0.746101	0.898367	0.748141	0.82855	0.852796	0.871741	0.867476
k-velo	0.285709	0.290853	0.271078	0.410938	0.291241	0.659092	0.549195	0.615894	0.561299	0.496791	0.563003	0.761572
veloVI	0.516157	0.45131	0.57393	0.563847	0.571173	0.743538	0.806774	0.81859	0.869708	0.871895	0.832118	0.893874
SDEvelo	0.348154	0.306611	0.26404	0.251558	-0.272971	0.450836	0.842557	0.842732	0.831827	0.830876	0.82456	0.912776
cell2fate	0.618918	0.542194	-0.389689	-0.500703	-0.518989	0.201911	0.830316	0.83766	0.67865	0.581421	0.782293	0.775427
SvelvetVAE	0.35107	-0.161712	-0.124458	0.453943	0.404597	0.419243	0.679013	0.701901	0.731248	0.790442	0.783766	0.829305
LatentVelo (std)	-0.154927	0.336141	-0.18686	-0.112629	-0.248649	0.400512	0.878902	0.77819	0.898102	0.927612	0.936673	0.882208
TIVelo (std)	0.575333	0.491561	0.549625	0.465395	0.516872	0.745689	0.693189	0.669271	0.73785	0.683679	0.660946	0.827001
TIVelo (simple)	0.561108	0.463919	0.515897	0.431177	0.474928	0.728321	0.603632	0.536011	0.546825	0.53428	0.556339	0.774434
scTour (MSE)	-0.301169	-0.166687	0.520574	-0.243919	0.429169	0.320627	0.452967	0.596083	0.644147	0.476227	0.688159	0.710815
scTour (NB)	0.557504	-0.445743	-0.401023	-0.428484	-0.489059	0.224447	0.916977	0.864555	0.902403	0.928324	0.932148	0.928504
scTour (ZINB)	0.552627	-0.452984	0.420437	-0.453793	-0.401113	0.229912	0.934505	0.877666	0.868859	0.925825	0.905606	0.924012
GraphVelo (std)	0.506341	0.514951	0.368018	0.399557	0.551542	0.692991	0.601806	0.658444	0.713315	0.723415	0.727147	0.802252

## Sheet: Table S8
Table S8: Evaluation results of Task VI
Methods	Data23_0_dcor	Data23_1_dcor	Data23_2_dcor	Data23_0_pearson	Data23_1_pearson	Data23_2_pearson	Data24_0_dcor	Data24_1_dcor	Data24_2_dcor	Data24_0_pearson	Data24_1_pearson	Data24_2_pearson	Data25_0_dcor	Data25_1_dcor	Data25_2_dcor	Data25_0_pearson	Data25_1_pearson	Data25_2_pearson	Data26_0_dcor	Data26_1_dcor	Data26_2_dcor	Data26_0_pearson	Data26_1_pearson	Data26_2_pearson	Data27_0_dcor	Data27_1_dcor	Data27_2_dcor	Data27_0_pearson	Data27_1_pearson	Data27_2_pearson	Data28_0_dcor	Data28_1_dcor	Data28_2_dcor	Data28_0_pearson	Data28_1_pearson	Data28_2_pearson
Velocyto	0.820594	0.756441	0.818008	0.910084	0.920349	0.915466	0.919184	0.873135	0.91165	0.469084	0.78854	0.795271	0.875465	0.852822	0.853085	0.342573	0.109769	0.0647279	0.934062	0.936167	0.933219	0.709524	0.607389	0.626859	0.112887	0.122831	0.697379	-0.461536	-0.786837	0.86928	0.152087	0.0991444	0.589183	-0.588443	-0.535383	0.590909
scVelo (dyn)	0.647245	0.459076	0.513973	-0.102531	0.910013	0.305654	0.674307	0.570825	0.713797	0.834044	0.905805	0.888335	0.776269	0.756449	0.745438	0.844123	0.805094	0.7756	0.909618	0.910954	0.906565	0.887726	0.89733	0.806106	0.0789372	0.085178	0.17352	-0.103661	0.839377	0.868945	0.102004	0.0499238	0.471306	0.361675	0.163097	0.67277
scVelo (stc)	0.734414	0.656581	0.740566	0.925723	0.9401	0.931183	0.819498	0.752258	0.818742	0.356037	0.787201	0.951352	0.876775	0.858635	0.853848	0.199445	0.174945	0.140229	0.940573	0.943884	0.944091	0.409705	0.364696	0.634024	0.11532	0.124937	0.696003	-0.736835	-0.802293	0.873633	0.155553	0.0993613	0.592536	-0.589824	-0.570861	0.585658
VeloAE	0.45261	0.642151	0.461847	0.767079	0.482986	0.919824	0.800387	0.590217	0.791068	0.836341	-0.175279	0.799506	0.79514	0.710326	0.756181	0.735236	0.60603	0.472158	0.829033	0.833757	0.841424	0.60597	0.586379	0.514627	0.086856	0.0920046	0.274779	-0.825307	-0.740377	0.747298	0.142331	0.0484701	0.372131	-0.611577	-0.566707	0.014923
Dynamo (m1)	0.209289	0.218103	0.2	0.906923	0.901184	0.899108	0.243161	0.282882	0.227106	0.941352	0.918191	0.942513	0.685902	0.727456	0.658426	0.916041	0.887165	0.899068	0.787392	0.778976	0.785463	0.986305	0.988237	0.982234	0.0955915	0.115913	0.231133	0.81628	0.835072	0.776079	0.142274	0.0844917	0.46469	0.745778	0.66827	0.68124
UniTVelo (ind)	0.68223	0.589165	0.672502	0.644022	0.518851	0.588593	0.764576	0.684276	0.74989	-0.434401	-0.437441	-0.487971	0.732314	0.698349	0.650503	0.779743	0.121593	0.520046	0.924177	0.920367	0.916845	0.867678	0.813807	0.721497	0.0591552	0.0802964	0.165408	-0.776841	-0.789684	0.751935	0.103188	0.0612161	0.507933	-0.245047	-0.194352	0.77176
UniTVelo (uni)	0.493927	0.54361	0.558389	0.695307	0.703145	0.740104	0.589969	0.488274	0.579754	0.746836	0.698356	0.757153	0.396538	0.497975	0.243835	0.37028	0.568216	0.12886	0.708393	0.795657	0.82327	0.763347	0.797908	0.915416	0.0777149	0.0802383	0.240521	-0.803998	-0.682507	0.732671	0.0304697	0.0251387	0.287927	0.0483488	-0.60455	0.77274
VeloVAE (std)	0.0281481	0.0911823	0.0562411	-0.499987	0.831269	0.410392	0.0555964	0.0996852	0.0204401	0.0882296	0.585953	0.190576	0.0808099	0.112567	0.0576429	-0.323011	-0.185738	-0.144198	0.0543997	0.0641896	0.097043	0.0660583	0.209556	-0.503436	0.0301276	0.0594725	0.138308	0.586519	-0.637711	0.215731	0.0355479	0.0203055	0.0759835	0.712514	0.198312	-0.0438514
VeloVAE (Full VB)	0.0516819	0.0141851	0.021118	-0.526439	0.347519	0.67857	0.0683498	0.0131897	0.28964	0.0785536	0.516719	0.599525	0.0815057	0.115435	0.0550768	-0.327239	-0.187149	-0.0717123	0.0518101	0.0787527	0.083292	0.0663708	-0.0650113	0.0525735	0.0176314	0.0415754	0.0667778	0.602078	-0.590724	-0.209708	0.0433446	0.0233302	0.0415434	0.730273	0.335406	-0.198313
DeepVelo	0.149271	0.148451	0.308118	0.901339	0.936532	0.92201	0.687404	0.636675	0.715809	0.909501	0.796044	0.930317	0.779988	0.653306	0.66696	0.370822	0.181125	0.187193	0.826475	0.866046	0.858304	0.693556	0.439958	0.496139	0.0821159	0.094234	0.50599	-0.73728	-0.810083	0.874541	0.129728	0.0600924	0.465864	-0.591698	-0.560332	0.416263
cellDancer	0.080018	0.085103	0.0624745	0.591634	-0.80556	-0.773382	0.0705007	0.07183	0.0676225	0.497671	0.482011	0.409101	0.124013	0.143798	0.136709	0.17221	-0.334794	-0.139438	0.183511	0.185411	0.188697	0.0887194	0.333087	0.381377	0.0279188	0.0250798	0.00310729	-0.416203	0.33408	-0.861599	0.0171835	0.0270718	0.00312372	-0.479828	-0.453199	-0.462324
Pyro-Velocity (m1)	0.129532	0.111422	0.131048	-0.965308	-0.965037	-0.961989	0.143883	0.124592	0.140119	-0.972616	-0.971164	-0.971061	0.677728	0.610497	0.463901	0.782074	0.792325	0.597687	0.818429	0.835173	0.827955	0.931321	0.935585	0.930882	0.0782399	0.1055	0.248419	0.82222	0.83725	0.866003	0.0403664	0.036383	0.48369	-0.0730355	0.717229	0.358857
Pyro-Velocity (m2)	0.349423	0.30557	0.367517	0.969377	0.968253	0.968431	0.395174	0.342807	0.398049	0.9706	0.969033	0.969067	0.725311	0.656622	0.679288	0.829004	0.808764	0.798465	0.827678	0.835916	0.825012	0.912455	0.920505	0.910249	0.0848807	0.0998701	0.175875	-0.791161	-0.784238	-0.494298	0.101089	0.0465734	0.437721	-0.669625	-0.803731	-0.763802
k-velo	0.757237	0.709469	0.776072	0.931364	0.875184	0.940881	0.829749	0.848558	0.866842	0.910944	0.855775	0.852036	0.872124	0.835532	0.806791	0.231539	0.25532	0.435069	0.844101	0.939111	0.927651	0.640542	0.678075	0.670086	0.026569	0.0925203	0.160382	-0.729215	-0.78832	0.806199	0.146268	0.063795	0.200833	-0.349005	-0.540412	0.307505
veloVI	0.713186	0.660231	0.722571	-0.236197	-0.528044	-0.197398	0.860913	0.832653	0.864896	0.848207	0.8004	0.830793	0.84011	0.825285	0.791435	0.87355	0.17229	0.435915	0.910497	0.914894	0.897829	0.422857	0.954841	-0.380466	0.0855508	0.0928824	0.234599	-0.80117	-0.728325	0.810295	0.0973053	0.0603228	0.331065	-0.410233	-0.445954	0.757775
SDEvelo	0.742938	0.685892	0.747688	0.974363	0.973777	0.971769	0.850285	0.823187	0.854317	0.979322	0.977517	0.974994	0.790609	0.748662	0.821693	0.991682	0.992627	0.993217	0.918272	0.930649	0.91761	0.99449	0.995104	0.994696	0.0870908	0.0906701	0.236778	-0.802983	-0.815336	0.834643	0.133974	0.0806727	0.516504	-0.720615	-0.777378	0.340604
cell2fate	0.302819	0.0351892	0.336958	0.568098	-0.215253	0.387807	0.323932	0.0201269	0.365945	0.499647	-0.130408	0.168921	0.643629	0.706213	0.493046	0.833012	0.866029	0.71278	0.555041	0.677739	0.794605	-0.265574	0.913729	0.412206	0.0188526	0.0503607	0.00300511	-0.140617	-0.574347	0.00103418	0.0131007	0.0476438	0.00241595	-0.10989	-0.142894	-0.0249204
SvelvetVAE	0.136153	0.140696	0.134234	0.791335	0.880424	0.850427	0.250437	0.296792	0.260661	0.776486	-0.224135	0.671415	0.423509	0.358348	0.231881	-0.0162225	0.447628	-0.760428	0.394509	0.273603	0.361542	0.636018	0.282892	-0.737207	0.0725032	0.0893771	0.154033	0.429152	0.723002	-0.803153	0.113703	0.0594987	0.350496	0.5998	0.28422	-0.645081
LatentVelo (std)	0.0345505	0.0509046	0.0372125	-0.941493	-0.934287	-0.944722	0.0731028	0.0728518	0.0669073	-0.948376	-0.932129	-0.947225	0.679683	0.697778	0.737999	0.875762	-0.948861	-0.970703	0.782527	0.774132	0.705793	-0.953584	-0.872533	-0.901682	0.0705752	0.0799491	0.247162	0.754529	0.711305	-0.734509	0.132861	0.0437074	0.390856	0.760117	0.790356	-0.607855
TIVelo (std)	0.0811008	0.0354661	0.0922885	0.937167	0.928721	0.934189	0.0720174	0.0944286	0.108075	0.941594	0.953372	0.929232	0.306333	0.339266	0.469095	-0.67869	-0.603918	0.145201	0.706836	0.696503	0.686812	0.260964	0.713754	0.326659	0.0617591	0.0532709	0.096037	-0.705534	-0.793596	0.858197	0.0305223	0.0374348	0.167737	-0.621239	-0.539616	0.334775
TIVelo (simple)	0.0796323	0.0350377	0.0930898	0.937679	0.944834	0.935726	0.070625	0.0938965	0.106883	0.93374	0.956058	0.928629	0.165967	0.190218	0.293854	-0.626389	-0.594065	0.0237153	0.589775	0.548216	0.533993	0.242894	0.496263	0.260522	0.0555695	0.0434891	0.0960367	-0.732491	-0.806128	0.858197	0.0265067	0.035315	0.167737	-0.617874	-0.569659	0.334778
scTour (MSE)	0.0498231	0.0500944	0.053046	0.8644	0.901976	0.883222	0.0380713	0.0624236	0.039207	0.874447	0.92971	0.905655	0.376829	0.328459	0.373885	-0.732062	-0.621762	-0.788556	0.595465	0.508223	0.681622	0.861184	-0.792744	-0.897407	0.081668	0.110506	0.00387517	-0.792754	-0.785279	-0.792754	0.141782	0.0472604	0.00393888	-0.675544	-0.714869	-0.675544
scTour (NB)	0.120291	0.108615	0.127956	0.970806	0.971551	0.971892	0.155479	0.121824	0.125131	0.977807	0.978022	0.979018	0.00575589	0.00948731	0.0074522	0.236882	-0.529541	-0.0313176	0.75469	0.728065	0.734531	-0.947934	-0.950168	-0.952367	0.0702703	0.107563	0.235568	-0.823622	-0.80503	-0.759342	0.108967	0.0566448	0.407765	-0.683667	-0.707371	-0.0081995
scTour (ZINB)	0.113137	0.106359	0.125228	0.971958	0.972706	0.972727	0.116774	0.0923794	0.103226	0.978359	0.977067	0.975757	0.460591	0.411093	0.321418	-0.829642	-0.826502	-0.813043	0.585031	0.447119	0.74193	-0.9257	-0.913476	-0.968597	0.061316	0.102731	0.237754	-0.796086	-0.798663	-0.803417	0.0470195	0.0278265	0.408984	-0.0839935	0.00735216	-0.0557236
GraphVelo (std)	0.649617	0.50979	0.554396	-0.628184	-0.911366	-0.941552	0.796866	0.564089	0.804974	0.64167	0.952931	0.722594	0.633038	0.61594	0.605977	0.85313	0.739122	0.903653	0.837234	0.82982	0.830717	0.978231	0.962358	0.919758	0.0455763	0.0596581	0.0607252	0.796801	0.829395	0.795959	0.0949967	0.0442976	0.0406108	0.718471	0.279341	0.790719

## Sheet: Table S9
Table S9: Evaluation results of Task VII (chromatin accessibility)
Methods	Data18_0_CBDir	Data18_1_CBDir	Data18_2_CBDir	Data18_0_ICVCoh	Data18_1_ICVCoh	Data18_2_ICVCoh	Data19_0_CBDir	Data19_1_CBDir	Data19_2_CBDir	Data19_0_ICVCoh	Data19_1_ICVCoh	Data19_2_ICVCoh	Data20_0_CBDir	Data20_1_CBDir	Data20_2_CBDir	Data20_0_ICVCoh	Data20_1_ICVCoh	Data20_2_ICVCoh
Velocyto	0.589624	0.596917	0.732691	0.722282	0.74856	0.699665	-0.252852	-0.183248	-0.171272	0.619089	0.527563	0.573739	-0.183043	-0.132553	-0.157946	0.567986	0.493905	0.550344
scVelo (dyn)	0.503329	0.342482	0.611536	0.675559	0.750163	0.766594	-0.0747141	-0.0404565	-0.150302	0.714556	0.752011	0.839711	0.000783469	0.14954	0.0930277	0.561847	0.714118	0.791245
scVelo (stc)	0.560794	0.586477	0.721929	0.702019	0.682172	0.707175	-0.25651	-0.197103	-0.187911	0.631006	0.553951	0.642278	-0.245192	-0.210399	-0.221862	0.666796	0.673466	0.682342
VeloAE	0.674213	0.669725	0.571768	0.89161	0.765406	0.805347	0.334715	-0.136551	0.324485	0.87129	0.685476	0.909753	-0.43318	-0.41863	0.321844	0.817801	0.864131	0.787258
Dynamo (m1)	0.307169	0.381639	0.547668	0.51617	0.599249	0.596902	0.00792018	0.00792018	0.00792018	0.736085	0.736085	0.736085	-0.237858	-0.219569	-0.249187	0.574124	0.62114	0.626371
UniTVelo (ind)	0.598958	0.606754	0.746995	0.790226	0.885355	0.80815	0.172988	0.263663	0.202186	0.778286	0.828376	0.790023	0.228074	0.276706	0.25087	0.74703	0.770989	0.82297
UniTVelo (uni)	0.613947	0.634312	0.788974	0.935311	0.953533	0.936841	-0.063576	-0.180076	0.390142	0.896649	0.918984	0.937916	0.148898	0.243207	0.209339	0.771385	0.759591	0.785447
VeloVAE (std)	-0.321755	-0.326336	-0.511255	0.364326	0.400655	0.354205	-0.421999	-0.446385	-0.0333306	0.713765	0.685375	0.354571	0.0644275	-0.166676	-0.290282	0.600633	0.643848	0.678667
VeloVAE (Full VB)	-0.187515	-0.274887	-0.536314	0.449983	0.560142	0.608726	-0.4732	-0.396677	0.0870392	0.818427	0.749182	0.670224	-0.182985	-0.154037	-0.254576	0.604449	0.695272	0.666473
DeepVelo	0.512961	0.511942	0.764698	0.651507	0.634913	0.741901	0.16819	0.237288	0.0623754	0.732825	0.802529	0.683345	0.111932	0.0234653	-0.272653	0.496814	0.613179	0.799721
cellDancer	0.545031	0.586671	0.567444	0.785783	0.716807	0.657376	-0.0121892	0.064	-0.0124117	0.732016	0.67037	0.668478	0.236155	0.216997	0.245059	0.638062	0.47275	0.561226
Pyro-Velocity (m1)	-0.658454	-0.575273	-0.684933	0.747061	0.756104	0.779356	-0.206642	-0.261996	-0.26662	0.900071	0.853523	0.888108	-0.177054	-0.101087	-0.195284	0.50665	0.533881	0.382884
Pyro-Velocity (m2)	0.674106	0.619848	0.745293	0.830833	0.832033	0.843638	0.281105	0.328073	0.307564	0.882065	0.898118	0.906022	0.269053	0.306039	0.392458	0.728508	0.799905	0.778837
k-velo	0.34816	0.472377	0.714779	0.532315	0.591535	0.484209	-0.249579	-0.042348	-0.0989224	0.693457	0.503745	0.311541	0.0921721	0.164619	-0.0590378	0.414479	0.426061	0.329452
veloVI	0.485405	0.500759	0.700543	0.640875	0.673057	0.542984	0.326989	0.348847	0.391677	0.895805	0.860545	0.841805	-0.202971	-0.190868	-0.314044	0.820067	0.788335	0.753398
SDEvelo	0.301828	0.350077	0.392005	0.756015	0.753957	0.762446	0.102466	0.137244	0.184096	0.768583	0.739733	0.793947	0.200563	0.136549	0.1163	0.506183	0.487451	0.388828
cell2fate	-0.0566415	0.530255	-0.598589	0.60629	0.589284	0.649939	-0.228034	0.151081	0.0983159	0.377423	0.586466	0.764662	-0.233883	-0.143321	-0.0076403	0.402448	0.556334	0.483066
SvelvetVAE	-0.223941	-0.666167	-0.777685	0.615941	0.686272	0.543068	-0.15828	-0.0925548	-0.193072	0.703005	0.640548	0.733566	0.0260353	-0.00701792	0.0524969	0.522203	0.500088	0.615689
LatentVelo (std)	0.607399	0.620958	0.783921	0.945274	0.939331	0.943102	-0.249839	-0.266839	-0.277578	0.877242	0.889233	0.87065	-0.0650243	0.0503714	-0.0742021	0.726787	0.939981	0.618249
latentvelo (ATAC)	-0.757584	-0.751383	-0.833171	0.91431	0.915959	0.926523	0.32207	0.125168	0.455878	0.922766	0.782657	0.883459	0.0428468	-0.0104743	0.0357572	0.275973	0.328947	0.896037
TIVelo (std)	0.407488	-0.657445	0.401113	0.684768	0.763025	0.811521	-0.28357	0.408664	0.491672	0.802837	0.810012	0.785444	-0.00922243	-0.2039	0.0988743	0.690702	0.721257	0.772332
TIVelo (simple)	0.384498	-0.662025	0.404693	0.652123	0.723874	0.783822	-0.268115	0.335591	0.422039	0.748009	0.762287	0.724416	-0.0307436	-0.240433	0.0644031	0.617599	0.677445	0.667989
scTour (MSE)	-0.23765	-0.260762	-0.140452	0.777361	0.762527	0.76842	0.264895	0.333423	0.284119	0.733518	0.842315	0.871413	0.264031	0.201428	0.30054	0.649761	0.541044	0.55551
scTour (NB)	0.504824	0.594598	0.770225	0.872394	0.872342	0.902401	0.188403	0.133449	0.200898	0.655973	0.561781	0.619808	0.190633	0.078547	0.221029	0.645313	0.531581	0.66949
scTour (ZINB)	0.501971	0.588481	0.771143	0.894677	0.86772	0.936431	-0.0502488	0.118092	0.0366248	0.806915	0.87245	0.870139	0.107907	0.144024	0.198521	0.394293	0.532738	0.679131
MultiVelo	0.58475	0.593591	0.777585	0.720856	0.734943	0.666631	0.0499063	0.391796	0.341716	0.725082	0.848748	0.878567	-0.141693	0.0553842	-0.237813	0.582833	0.594883	0.609372
GraphVelo (std)	0.111542	-0.10962	0.12528	0.669588	0.640705	0.692895	-0.00143378	0.1604	-0.0479736	0.619211	0.742158	0.691943	-0.115462	-0.0307539	-0.118018	0.545848	0.559937	0.559444
GraphVelo (ATAC)	0.304843	0.417777	0.525358	0.777714	0.596541	0.775716	-0.0114699	0.277448	0.412605	0.571008	0.771904	0.72567	-0.147453	-0.0682805	-0.145234	0.732575	0.738815	0.661145

[truncated: 5 more sheets: Table S10, Table S11, Table S12, Table S13, Table S14]
